# Supplementary material
Source: Springer Nature journal article supplement (https://www.springermedizin.de/resource/supplementary/12877_2014_1066_MOESM2_ESM.pdf/9440746)

## Additional file 2. Calibration plots for 7- and 10-year follow-up

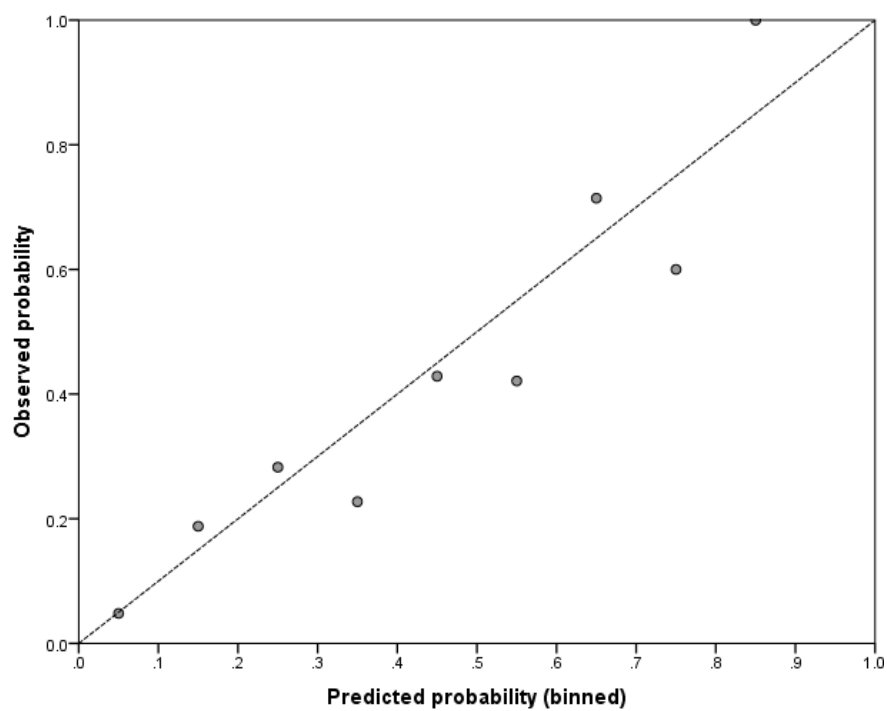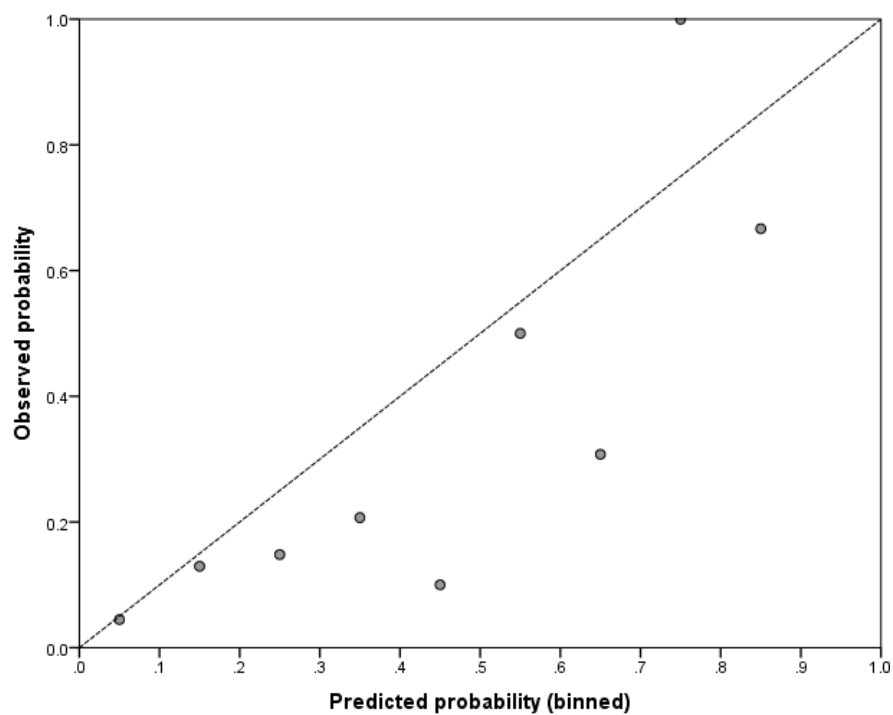

Supplement: MOESM2 [file 9440746]
